# Supplementary material for: The Fate of Heavy Metals and Risk Assessment of Heavy Metal in Pyrolysis Coupling with Acid Washing Treatment for Sewage Sludge
Source: MDPI journal article supplement (doi:10.3390/toxics11050447), 2023-05-09
Supplement: s1 [file s1]

# Supplementary Materials

## **The Fate of Heavy Metals and Risk Assessment of Heavy Metal in Pyrolysis Coupling with Acid Washing Treatment for Sewage Sludge**

Zhiwei Li <sup>a,b</sup>, Di Yu <sup>a</sup>, Xuejiao Liu <sup>a</sup>, Yin Wang <sup>a,c,d\*</sup>

<sup>a</sup> CAS Key Laboratory of Urban Pollutant Conversion, Institute of Urban Environment, Chinese Academy of Sciences, Xiamen 361021, China

<sup>b</sup> University of Chinese Academy of Sciences, Beijing 100049, China

<sup>c</sup> Ningbo (Beilun) Zhongke Haixi Industrial Technology Innovation Center, Ningbo 315000, China

<sup>d</sup> Key Laboratory of Urban Environment and Health, Ningbo Observation and Research Station, Institute of Urban Environment, Chinese Academy of Sciences, Xiamen 361021, Peoples R China

\* Corresponding author, E-mail: [yinwang@iue.ac.cn](mailto:yinwang@iue.ac.cn)

## **Figure captions**

**Figure S1:** Schematic diagram of the pyrolysis experimental apparatus

**Figure S2:** Thermogravimetric curve of chromium-rich tanning sludge

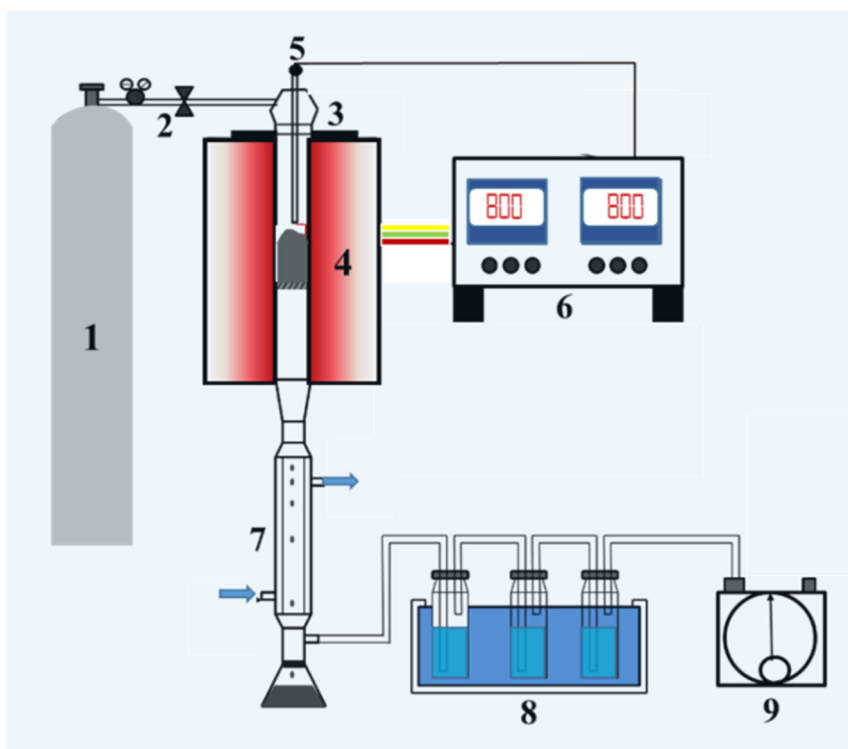

**Figure S1.** Schematic diagram of the pyrolysis experimental apparatus

(1-Nitrogen; 2-Flow control meter; 3-Fixed bed quartz reactor; 4-Electrically heated furnace; 5-Thermocouple; 6-Temperature controller; 7-Condenser; 8-Acetone trap; 9-Gas collector).

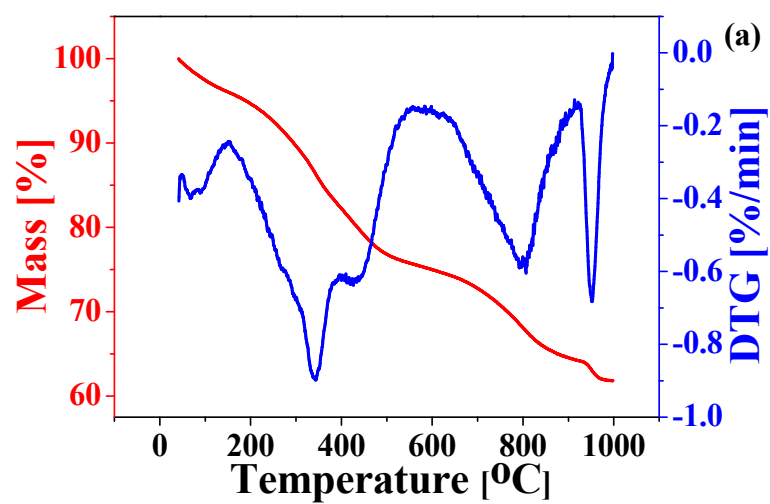

**Figure S2** Thermogravimetric curve of chromium-rich tanning sludge.

## **Table List**

**Table S1:** Heavy metals concentration of sludge samples and relevant Chinese legal standards

**Table S2:** The recovery of the sum of four fractions ratio the total HMs concentration

**Table S3:** The levels of each variable and corresponding heavy metals removal from BC400 obtained from the Box–Behnken design

**Table S4:** ANOVA for Response Surface Quadratic Model

**Table S5:** The leaching concentration of heavy metals in sludge and biochars

**Table S1.** Heavy metals concentration of sludge samples and relevant Chinese legal standards.

| Heavy metal | Average concentration in sludge (mg/kg) | Standards                                  |        |                                            |        |                                        |         |
|-------------|-----------------------------------------|--------------------------------------------|--------|--------------------------------------------|--------|----------------------------------------|---------|
|             |                                         | Quality of sludge used in gardens or parks |        | Quality of sludge used in land improvement |        | Control standards for agricultural use |         |
|             |                                         | pH<6.5                                     | pH>6.5 | pH<6.5                                     | pH>6.5 | Level A                                | Level B |
| Cu          | 7945.24±30.54                           | 800                                        | 1500   | 800                                        | 1500   | 500                                    | 1500    |
| Zn          | 4794.85±17.32                           | 2000                                       | 4000   | 2000                                       | 4000   | 1500                                   | 3000    |
| Cr          | 8195.13±10.36                           | 600                                        | 1000   | 600                                        | 1000   | 500                                    | 1000    |
| Ni          | 1341.51±4.43                            | 100                                        | 200    | 100                                        | 200    | 100                                    | 200     |
| As          | 24.56±3.64                              | 75                                         | 75     | 75                                         | 75     | 30                                     | 75      |
| Pb          | 29.47±1.03                              | 300                                        | 1000   | 300                                        | 1000   | 300                                    | 1000    |
| Cd          | 1.23±0.06                               | 5                                          | 20     | 5                                          | 20     | 3                                      | 15      |

**Table S2.** The recovery of the sum of four fractions ratio the total heavy metals concentration.

| Sample | Cr concentration of fractions [mg/kg] |            |            |            | Sum<br>[mg/kg] | Total<br>concentration<br>[mg/kg] | Recovery<br>[%] |        |
|--------|---------------------------------------|------------|------------|------------|----------------|-----------------------------------|-----------------|--------|
|        | F1                                    | F2         | F3         | F4         |                |                                   |                 |        |
| Cu     | SS                                    | 1640±10.46 | 506±7.63   | 3472±5.83  | 2522±9.73      | 8140                              | 7945±20.43      | 102.45 |
|        | BC400                                 | 1250±9.87  | 24±1.21    | 5446±20.65 | 3317±8.67      | 10037                             | 10175±19.67     | 98.64  |
|        | BC600                                 | 36±2.69    | 26±0.43    | 7550±12.67 | 3664±9.65      | 11275                             | 11335±33.54     | 99.47  |
|        | BC800                                 | 17±1.31    | 29±0.54    | 8066±32.75 | 4681±7.43      | 12793                             | 12525±37.87     | 102.14 |
| Zn     | SS                                    | 1336±7.34  | 1051±8.93  | 181±0.72   | 1220±3.92      | 3788                              | 3794±21.32      | 99.83  |
|        | BC400                                 | 858±6.24   | 1459±10.66 | 1180±21.56 | 2638±8.32      | 6134                              | 6185±28.22      | 99.18  |
|        | BC600                                 | 243±3.15   | 1461±12.39 | 950±12.32  | 4170±10.38     | 6824                              | 6776±25.87      | 100.71 |
|        | BC800                                 | 18±0.23    | 517±8.93   | 478±6.32   | 6640±20.67     | 7654                              | 7560±24.33      | 101.24 |
| Cr     | SS                                    | 0          | 0          | 1013±8.23  | 7377±19.84     | 8390                              | 8195±29.87      | 102.38 |
|        | BC400                                 | 0          | 0          | 434±1.64   | 9936±23.74     | 10369                             | 10385±30.57     | 99.85  |
|        | BC600                                 | 0          | 0          | 0          | 10930±38.90    | 10930                             | 11080±34.11     | 98.65  |
|        | BC800                                 | 0          | 0          | 0          | 12510±34.87    | 12510                             | 12200±40.05     | 102.54 |
| Ni     | SS                                    | 738±1.32   | 236±0.63   | 316±0.72   | 102±1.92       | 1392                              | 1342±8.71       | 103.74 |
|        | BC400                                 | 174±0.84   | 260±0.84   | 1089±13.82 | 168±2.07       | 1691                              | 1693±3.87       | 99.86  |
|        | BC600                                 | 342±1.43   | 479±1.02   | 814±11.82  | 192±1.55       | 1827                              | 1851±8.54       | 98.65  |
|        | BC800                                 | 39±0.32    | 1446±10.36 | 578±2.63   | 73±0.87        | 2136                              | 2085±10.56      | 102.47 |

**Table S3.** The levels of each variable and corresponding heavy metals removal from BC400 obtained from the Box–Behnken design.

| No<br>. | A-H <sub>3</sub> PO <sub>4</sub><br>Conc. (mol/L) | B:L/S<br>ratio<br>(%) | Washing<br>Temperature<br>(°C ) | Removal Efficiency<br>(%) |                    |
|---------|---------------------------------------------------|-----------------------|---------------------------------|---------------------------|--------------------|
|         |                                                   |                       |                                 | Actual<br>Value           | Predicted<br>Value |
| 1       | 0.5                                               | 6                     | 50                              | 71.19                     | 72.71              |
| 2       | 2                                                 | 6                     | 50                              | 93.18                     | 93.85              |
| 3       | 0.5                                               | 10                    | 50                              | 72.64                     | 72.71              |
| 4       | 2                                                 | 10                    | 50                              | 83.64                     | 80.32              |
| 5       | 0.5                                               | 8                     | 25                              | 73.39                     | 73.3               |
| 6       | 2                                                 | 8                     | 25                              | 75.6                      | 79.01              |
| 7       | 0.5                                               | 8                     | 75                              | 70.85                     | 70.18              |
| 8       | 2                                                 | 8                     | 75                              | 73.75                     | 72.71              |
| 9       | 1.25                                              | 6                     | 25                              | 49.28                     | 52.6               |
| 10      | 1.25                                              | 10                    | 25                              | 71.57                     | 72.71              |
| 11      | 1.25                                              | 6                     | 75                              | 62.15                     | 58.74              |
| 12      | 1.25                                              | 10                    | 75                              | 76.62                     | 76.71              |
| 13      | 1.25                                              | 8                     | 50                              | 75.69                     | 79.77              |
| 14      | 1.25                                              | 8                     | 50                              | 74.4                      | 72.71              |
| 15      | 1.25                                              | 8                     | 50                              | 76.4                      | 72.32              |
| 16      | 1.25                                              | 8                     | 50                              | 49.73                     | 50.49              |
| 17      | 1.25                                              | 8                     | 50                              | 82.36                     | 81.6               |



**Table S4.** ANOVA for Response Surface Quadratic Model.

| Source                                                              | Sum of Squares | df | Mean Square | F Value | <i>p</i> -value<br>Prob > F |             |
|---------------------------------------------------------------------|----------------|----|-------------|---------|-----------------------------|-------------|
| Model                                                               | 1788.8         | 9  | 198.76      | 15.77   | 0.0007                      | significant |
| A-A                                                                 | 1090.23        | 1  | 1090.23     | 86.53   | < 0.0001                    |             |
| B-B                                                                 | 3.91           | 1  | 3.91        | 0.31    | 0.5948                      |             |
| C-C                                                                 | 66.67          | 1  | 66.67       | 5.29    | 0.055                       |             |
| AB                                                                  | 241.96         | 1  | 241.96      | 19.2    | 0.0032                      |             |
| AC                                                                  | 8.01           | 1  | 8.01        | 0.64    | 0.4515                      |             |
| BC                                                                  | 1.08           | 1  | 1.08        | 0.086   | 0.778                       |             |
| A <sup>2</sup>                                                      | 44.99          | 1  | 44.99       | 3.57    | 0.1007                      |             |
| B <sup>2</sup>                                                      | 96.86          | 1  | 96.86       | 7.69    | 0.0276                      |             |
| C <sup>2</sup>                                                      | 16.53          | 1  | 16.53       | 1.31    | 0.2897                      |             |
| Residual                                                            | 88.2           | 7  | 12.6        |         |                             |             |
| Lack of Fit                                                         | 80.65          | 3  | 26.88       | 14.24   | 0.0133                      | significant |
| Pure Error                                                          | 7.55           | 4  | 1.89        |         |                             |             |
| Cor Total                                                           | 1877           | 16 |             |         |                             |             |
| R <sup>2</sup> = 0.9882, R <sup>2</sup> (Adj)= 0.9768, C.V.(%)=2.01 |                |    |             |         |                             |             |

**Table S5.** The leaching concentration of heavy metals in sludge and biochars.

| Sample           | Leached concentration (mg/L) |            |           |            |
|------------------|------------------------------|------------|-----------|------------|
|                  | Cu                           | Zn         | Cr        | Ni         |
| SS               | 26.41±0.23                   | 25.46±0.32 | 0.58±0.02 | 27.58±0.43 |
| BC400            | 19.82±0.36                   | 17.36±0.25 | 3.69±0.07 | 8.82±0.32  |
| BC600            | 11.91±0.12                   | 1.33±0.05  | 0.28±0.02 | 13.14±0.31 |
| BC800            | 5.92±0.14                    | 0.172±0.02 | 0.23±0.03 | 3.02±0.05  |
| AWSS             | 1.13±0.06                    | 2.32±0.03  | 0.22±0.01 | 0.20±0.01  |
| AWBC400          | 0.17±0.02                    | 1.86±0.03  | -         | 0.88±0.02  |
| AWBC600          | 1.54±0.03                    | 0.14±0.01  | -         | 0.61±0.03  |
| AWBC800          | 4.58±0.08                    | -          | -         | 0.25±0.03  |
| the USEPA limits | 5                            | 5          | 5         | 5          |

Note: the SS represents the dry sludge, AWXX represents the sample after washing.
